# Supplementary material for: Multiple receptor tyrosine kinase activation related to ALK inhibitor resistance in lung cancer cells with ALK rearrangement
Source: PubMed Central journal article supplement (PMC5601691; doi:10.18632/oncotarget.17680), 2017-05-08
Supplement: oncotarget-08-58771-s001.pdf [file oncotarget-08-58771-s001.pdf]

## Multiple receptor tyrosine kinase activation related to ALK inhibitor resistance in lung cancer cells with ALK rearrangement

### SUPPLEMENTARY FIGURE

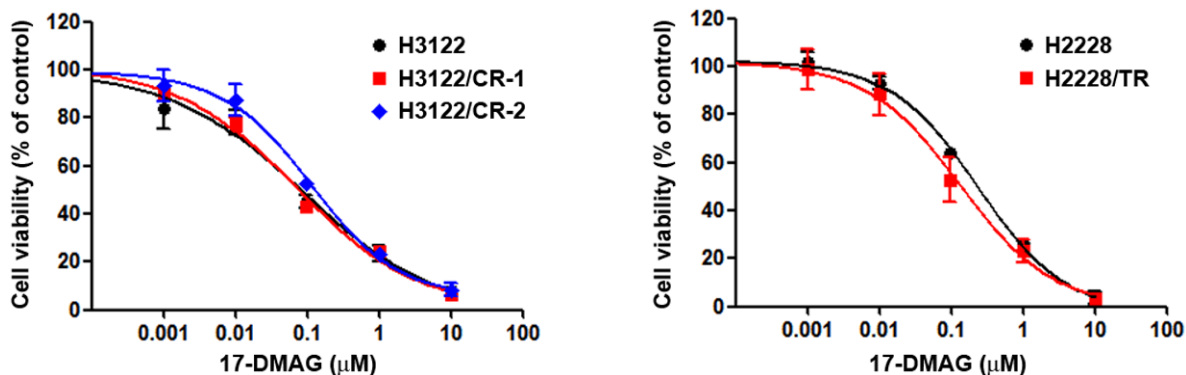

**Supplementary Figure 1: Effect of 17-DMAG in cells with acquired resistance to ALK inhibitors.** Cells were treated with the indicated concentrations of 17-DMAG for 72 h. Cell viability was measured using the MTT assay.
